# Supplementary material for: Digital transformation and middle managers’ leadership skills and behavior: a group concept mapping approach
Source: Frontiers journal article supplement (doi:10.3389/fpsyg.2023.1147002), 2023-09-04
Supplement: Table_1.pdf [file Table_1.pdf]

## Appendix A. Overview of statements per cluster

|                                      |                                                                                            |
|--------------------------------------|--------------------------------------------------------------------------------------------|
| Cluster 1 - Improvements and results |                                                                                            |
| 1                                    | Support online teams*                                                                      |
| 32                                   | Lead by result <sup>§</sup>                                                                |
| 41                                   | Stimulate remote working                                                                   |
| 53                                   | Taking opportunities to improve work                                                       |
| 54                                   | Evaluate digital work                                                                      |
| 55                                   | Encourage efficient work                                                                   |
| 67                                   | Able to structure workflows                                                                |
| 72                                   | Focus on performance <sup>§</sup>                                                          |
| 74                                   | Ensure work-life balance                                                                   |
| 77                                   | Process monitoring <sup>§</sup>                                                            |
| Cluster 2 - Digital technology       |                                                                                            |
| 24                                   | Aware of the possibilities of informatics and robotics                                     |
| 29                                   | Thinking in terms of profitability                                                         |
| 35                                   | Knowledge of digital tools/assets/software/hardware                                        |
| 36                                   | Recognizing the value of digital tools                                                     |
| 37                                   | Encouraging use of digital tools and resources                                             |
| 51                                   | Recognizing benefits of digital technology                                                 |
| 64                                   | Critical of the added value of digitalization                                              |
| 68                                   | Aware of the influence of digitalization                                                   |
| 75                                   | Support employees to cope with responsibilities of the freedoms that digitalization offers |
| 76                                   | Monitoring online privacy and security                                                     |
| 78                                   | Able to structure information using digital possibilities                                  |
| 79                                   | Able to structure processes with the help of digital possibilities                         |
| 80                                   | Support employees to accept digitalization                                                 |
| 82                                   | Being able to use digital tools to simplify processes                                      |
| 86                                   | Seek connections between online and offline contexts                                       |
| 90                                   | (Digital) information literate                                                             |
| 92                                   | Making the usefulness of digitalization visible                                            |
| Cluster 3 - Cooperation              |                                                                                            |
| 38                                   | Investing in external cooperation regarding surveillance in digital environments           |
| 39                                   | Investing in external cooperation regarding enforcement in digital environments            |
| 40                                   | Investing in public-private cooperation in learning and development                        |
| 43                                   | Stimulating internal cooperation <sup>Ⓢ</sup>                                              |
| 56                                   | Encouraging staying informed about each other's work                                       |
| 57                                   | Stimulating internal collaboration                                                         |
| 58                                   | Fostering interpersonal communication <sup>Ⓢ</sup>                                         |
| 91                                   | Encouraging international cooperation                                                      |
| Cluster 4 - Self                     |                                                                                            |
| 2                                    | Critical thinking*                                                                         |
| 4                                    | Open to feedback*                                                                          |
| 5                                    | Authentic*                                                                                 |
| 8                                    | Integrity*                                                                                 |
| 10                                   | Vulnerable*                                                                                |
| 11                                   | Humbleness*                                                                                |
| 12                                   | Creativity*                                                                                |
| 13                                   | Patient*                                                                                   |
| 14                                   | Tolerant*                                                                                  |
| 15                                   | Empathic*                                                                                  |
| 16                                   | Broad-minded*                                                                              |
| 17                                   | Emotional intelligence*                                                                    |

## Digital Transformation and Middle Managers' Leadership Skills and Behavior

- 20 Adaptability\*
- 22 Open to innovation\*
- 25 Restraint
- 27 Realistic
- 31 Trust
- 46 Convincing
- 48 Inspiring
- 60 Thoughtful
- 61 Sympathetic
- 62 Flexible
- 63 Open minded
- 66 Committed
- 70 Dedicated
- 85 Curiosity
- 87 Courageous
- 89 Good sense of ethics
- 94 Understanding

---

### Cluster 5 - Change and ambivalence

---

- 18 Teambuilding skills\*
- 19 Dealing with change\*
- 21 Unafraid to fail\*
- 23 Open to experimenting\*
- 26 Sharp focus
- 33 Adaptable leadership style
- 34 Consideration across generations
- 52 Recognizing opportunities
- 59 Making quick decisions
- 65 Offering custom solutions
- 84 Coping with resistance
- 88 Pursuing a higher goal

---

### Cluster 6 - Others

---

- 3 Communicating effectively\*
- 6 Relationship orientation\*
- 7 Coping with uncertainty\*
- 9 Sharing responsibilities\*
- 28 Encouraging out-of-the-box thinking
- 30 Facilitating learning and development
- 42 Maintaining personal contact
- 44 Enthusiasing employees
- 45 Motivating
- 47 Stimulating
- 49 Attention on the individual
- 50 Thinking in possibilities
- 69 Empowering people
- 71 Creating connections between people
- 73 Networking skills
- 81 Showing sustainable behaviors
- 83 Sensitive to feelings
- 93 Supporting employees with coping with change

Note. \*Statements from theory; §Statements reassigned from Cluster 5; ©Statements reassigned from Cluster 6.
